# Supplementary material for: Surface-engineered nanogel assemblies with integrated blood compatibility, cell proliferation and antibacterial property: towards multifunctional biomedical membranes
Source: Royal Society of Chemistry journal article supplement (doi:10.1039/c4py00870g), 2014-01-01
Supplement: c4py00870g1.pdf [file c4py00870g1.pdf]

## Supporting Information

# Surface engineered 3D nanogels assembly with integrated blood compatibility, cell proliferation and antibacterial property: towards multifunctional biomedical membrane

Yi Xia,<sup>a,1</sup> Chong Cheng,<sup>a,b,1,\*</sup> Rui Wang,<sup>a</sup> Hui Qin,<sup>a</sup> Yi Zhang,<sup>a</sup> Lang Ma,<sup>a</sup> Hong Tan,<sup>a</sup> Zhongwei Gu,<sup>c</sup>  
and Changsheng Zhao,<sup>a,c,\*</sup>

<sup>a</sup> *College of Polymer Science and Engineering, State Key Laboratory of Polymer Materials Engineering, Sichuan University, Chengdu 610065, China*

<sup>b</sup> *Department of Chemical Engineering, Department of Biomedical Engineering, University of Michigan, Ann Arbor, Michigan, 48109, USA*

<sup>c</sup> *National Engineering Research Center for Biomaterials, Sichuan University, Chengdu 610064, China*

<sup>1</sup> *These two authors contribute equally to this work.*

\* *Corresponding author. Tel: +86-28-85400453, Fax: +86-28-85405402, E-mail: (C. Cheng) sagecheng@163.com or chengcho@umich.edu; (C.S. Zhao) zhaochsh70@163.com or zhaochsh70@scu.edu.cn*

### 1. Water contact angle

The membrane hydrophilicity was characterized via the data of static contact angle using a contact angle goniometer (OCA20, Dataphysics, Germany) equipped with a video capture. A piece of 2×2 cm<sup>2</sup> membrane was attached on a glass slide and mounted on the goniometer. For the static contact angle

measurements, a total of 3  $\mu\text{L}$  DI water was dropped on the membrane surface at room temperature, and the contact angle was measured after 10 s. At least 8 measurements were averaged to get a reliable value. The measurement error was  $\pm 3^\circ$ .

## **2. Protein adsorption**

Protein adsorption experiments were carried out with BSA solutions and BFG solution under the static condition, respectively. Firstly, the membranes,  $1 \times 1 \text{ cm}^2$ , was immersed in PBS (containing BSA or BFG with the concentration of 1 mg/mL) and incubated at 37 °C for 1 hour; then the membranes were rinsed slightly with PBS and DI water. Then the membranes were transferred into a washing solution (containing 2 % sodium dodecyl sulfate (SDS) and 0.05 M NaOH) at 37 °C; and then shaken for 2 hours to remove the adsorbed BSA or BFG protein. The above adsorption and desorption times were pre-determined based on preliminary experiments. The protein concentration in the washing solution was used to calculate the adsorbed protein amounts and determined by using the Micro BCA™ Protein Assay Reagent Kit (PIERCE). More than 95 % of the adsorbed protein could be eluted into the SDS solution.

## **3. Anticoagulant property of the membranes**

To evaluate the antithrombotic activity of the heparin-mimicking membranes, activated partial thromboplastin time (APTT) and thrombin time (TT) were measured to evaluate the blood clotting time and thrombotic potential.<sup>2</sup>

The APTT and TT were tested by automated blood coagulation analyzer CA-50 (Sysmex Corporation, Kobe, Japan), and the method for each measurement was described as follows: synchronously, the membranes (0.5 cm × 0.5 cm, three pieces) were immersed in PBS (200 μL, pH = 7.4) for 1 hour. Then the PBS was removed and 100 μL of fresh collected platelet-poor plasma (PPP) was introduced. After incubating at 37 °C for 30 minutes, 50 μL of the incubated PPP was added into the test cup, followed by adding 50 μL APTT agent (pre-incubated for 10 minutes before use) and then incubated at 37 °C for another 3 minutes. Thereafter, 50 μL of 0.025 M CaCl<sub>2</sub> solution was added, and then the APTT was measured. At least 3 tests were conducted and the results were analyzed by a statistical method.

The TT test was carried out in a similar process as the APTT test, after membranes were firstly incubated with PPP, the pre-incubated 100 μL of TT agent was added into the test cup (containing 50 μL of the incubated PPP), and then the TT was measured.

#### **4. Platelet adhesion**

In order to eliminate the interference of other components of blood, such as erythrocyte and leucocyte, the platelet-rich-plasma (PRP) was used for the study of platelet adhesion on the nanogels and heparin-like polymers assembled membranes using healthy fresh human blood.<sup>1</sup>

The pristine PES and surface assembled PES membranes were immersed in PBS and equilibrated at 37 °C for 1 h. Firstly, the PBS was removed and then 1

ml of fresh PRP was introduced, the membranes were incubated with PRP at 37 °C for 2 h. Then the PRP was decanted off and the membranes were rinsed for 3 times with PBS. Finally, the membranes were treated with 2.5 wt. % glutaraldehyde in PBS at 4 °C for 1 day. Drying process: the samples were first washed with PBS, then passed through a series of graded alcohol-PBS solutions (30, 50, 70, 80, 90, 95 and 100%, 10 minutes for each ) and isoamyl acetate-alcohol solutions (25%, 50%, 75%, and 100%, 15 minutes for each),<sup>1</sup> Followed with the liquid CO<sub>2</sub> critical point drying of the samples. For SEM observation: the specimens were sputter-coated with a gold layer and examined by using a FE-SEM (JSM-7500F, JEOL, Japan). The adhered platelets numbers of the membranes was calculated from 6 SEM pictures at 500× magnification from different places on each membrane, respectively.

## **5. Cell culture**

Human umbilical vein endothelial cells (HUVECs) were grown in R1640 medium, which was supplemented with 10% fetal bovine serum (FBS, Hyclone, USA) and 2 mM L-glutamine and 1% (*V/V*) antibiotics mixture (10000 U penicillin and 10 mg streptomycin). Cell cultures were maintained in humidified atmosphere of 5% CO<sub>2</sub> at 37 °C. Confluent cells were detached from the cell culture flask with sterilized PBS and 0.05% trypsin/EDTA solutions, and the cell culture medium was changed every day.

The sterilized PES and surface assembled PES membranes with an area of  $1 \times 1 \text{ cm}^2$  were pre-wetted in 24-well cell-culture polystyrene plates by cell culture medium for 3 h in a  $37 \text{ }^\circ\text{C}$  incubator.

## 6. Cell morphology on the membranes

For the SEM observation, the HUVECs were seeded onto the pristine and modified membranes at a density of approx.  $2.5 \times 10^4 \text{ cells/cm}^2$ . After 5 d, the seeded membranes were rinsed with PBS immediately and then fixed by 2.5 % (wt. %) glutaraldehyde in PBS solution at  $4 \text{ }^\circ\text{C}$  for 12 h. For cell morphology observation, the fixed membranes were subjected to a drying process by passing them through graded alcohol-PBS solutions (30, 50, 70, 80, 90, 95 and 100 %, 10 minutes for each ) and then dehydrated through isoamyl acetate-alcohol solutions (25, 50, 75, and 100 %, 15 minutes for each), and followed by using the liquid  $\text{CO}_2$  critical point drying . The samples were then sputter-coated with a gold layer and examined by a FE-SEM (JSM-7500F, JEOL, Japan).

1. C. Cheng, S. Nie, S. Li, H. Peng, H. Yang, L. Ma, S. Sun and C. Zhao, *J. Mater. Chem. B*, 2013, **1**, 265-275.
2. P.-C. Chen, L.-S. Wan and Z.-K. Xu, *J. Mater. Chem.*, 2012, **22**, 22727-22733.
